# Supplementary material for: Metal speciation of volcanic aerosols from Mt. Etna at varying aerosol water content and pH obtained by different thermodynamic models
Source: Royal Society of Chemistry journal article supplement (doi:10.1039/d4ea00108g), 2024-10-31
Supplement: d4ea00108g1.xlsx [file d4ea00108g1.xlsx]

## Sheet: PM_conc
Site (coordinates)	Start Date	Start Time	End Date	End Time	T start (°C)	P start (mbar)	T end (°C)	P end (mbar)	Size fraction	Filter code	Mass (mg)	V (L)	t (min)	PM (ug/m3)	PM cumulative (ug/m3)	Filter number	Mass (mg)	V (L)	t (min)	PM (ug/m3)	PM cumulative (ug/m3)
Summit (37.7492631, 14.9921942)	2019-07-08	13:45:00	2019-07-08	15:45:00			18	640	PM10-2.5	G1-C-TFA-MET	0.14	1157	128	121.003	777.874	G1-C-TFA-SUL	0.18	1146	127	157.068	881.326
Summit (37.7492631, 14.9921942)	2019-07-08	13:45:00	2019-07-08	15:45:00			18	640	PM2.5-1	G1-C-TFB-MET	0.09	1157	128	77.7874	656.871	G1-C-TFB-SUL	0.07	1146	127	61.082	724.258
Summit (37.7492631, 14.9921942)	2019-07-08	13:45:00	2019-07-08	15:45:00			18	640	PM1-0.5	G1-C-TFC-MET	0.07	1157	128	60.5013	579.084	G1-C-TFC-SUL	0.07	1146	127	61.082	663.176
Summit (37.7492631, 14.9921942)	2019-07-08	13:45:00	2019-07-08	15:45:00			18	640	PM0.5-0.25	G1-C-TFD-MET	0.29	1157	128	250.648	518.583	G1-C-TFD-SUL	0.31	1146	127	270.506	602.094
Summit (37.7492631, 14.9921942)	2019-07-08	13:45:00	2019-07-08	15:45:00			18	640	PM0.25	G1-C-TFE-MET	0.31	1157	128	267.934	267.934	G1-C-TFE-SUL	0.38	1146	127	331.588	331.588
Summit (37.7491115, 14.9955540)	2019-07-12	12:45:00	2019-07-12	14:45:00	18	677	16.6	674	PM10-2.5	G2-C-TFA-MET	0.09	1084	120	83.0258	424.354	G2-C-TFA-SUL	0.06	1078	119	55.6586	463.822
Summit (37.7491115, 14.9955540)	2019-07-12	12:45:00	2019-07-12	14:45:00	18	677	16.6	674	PM2.5-1	G2-C-TFB-MET	0.05	1084	120	46.1255	341.328	G2-C-TFB-SUL	0.08	1078	119	74.2115	408.163
Summit (37.7491115, 14.9955540)	2019-07-12	12:45:00	2019-07-12	14:45:00	18	677	16.6	674	PM1-0.5	G2-C-TFC-MET	0.01	1084	120	9.22509	295.203	G2-C-TFC-SUL	0	1078	119	0	333.952
Summit (37.7491115, 14.9955540)	2019-07-12	12:45:00	2019-07-12	14:45:00	18	677	16.6	674	PM0.5-0.25	G2-C-TFD-MET	0.16	1084	120	147.601	285.978	G2-C-TFD-SUL	0.14	1078	119	129.87	333.952
Summit (37.7491115, 14.9955540)	2019-07-12	12:45:00	2019-07-12	14:45:00	18	677	16.6	674	PM0.25	G2-C-TFE-MET	0.15	1084	120	138.376	138.376	G2-C-TFE-SUL	0.22	1078	119	204.082	204.082
Milo (37.731172, 15.113134)	2019-07-10	12:00:00	2019-07-11	12:20:00	29	914	31.5	908.333	PM10-2.5	G2-D-TFA-MET	0.45	13168	1463	34.1738	67.5881	G2-D-TFA-SUL	0.44	13156	1461	33.4448	84.3721
Milo (37.731172, 15.113134)	2019-07-10	12:00:00	2019-07-11	12:20:00	29	914	31.5	908.333	PM2.5-1	G2-D-TFB-MET	0.14	13168	1463	10.6318	33.4143	G2-D-TFB-SUL	0.23	13156	1461	17.4825	50.9273
Milo (37.731172, 15.113134)	2019-07-10	12:00:00	2019-07-11	12:20:00	29	914	31.5	908.333	PM1-0.5	G2-D-TFC-MET	0.13	13168	1463	9.87242	22.7825	G2-D-TFC-SUL	0.2	13156	1461	15.2022	33.4448
Milo (37.731172, 15.113134)	2019-07-10	12:00:00	2019-07-11	12:20:00	29	914	31.5	908.333	PM0.5-0.25	G2-D-TFD-MET	0.01	13168	1463	0.759417	12.9101	G2-D-TFD-SUL	0.07	13156	1461	5.32077	18.2426
Milo (37.731172, 15.113134)	2019-07-10	12:00:00	2019-07-11	12:20:00	29	914	31.5	908.333	PM0.25	G2-D-TFE-MET	0.16	13168	1463	12.1507	12.1507	G2-D-TFE-SUL	0.17	13156	1461	12.9219	12.9219
Control (37.7554103, 14.9884877)	2019-07-12	11:35:00	2019-07-12	15:11:00	26.8	781	34.9	793	PM10-2.5	G3-D-TFA-MET	0.06	1990	221	30.1508	90.4523	G3-D-TFA-SUL	0.05	1989	221	25.1383	70.3871
Control (37.7554103, 14.9884877)	2019-07-12	11:35:00	2019-07-12	15:11:00	26.8	781	34.9	793	PM2.5-1	G3-D-TFB-MET	0	1990	221	0	60.3015	G3-D-TFB-SUL	-0.07	1989	221	0	45.2489
Control (37.7554103, 14.9884877)	2019-07-12	11:35:00	2019-07-12	15:11:00	26.8	781	34.9	793	PM1-0.5	G3-D-TFC-MET	0.05	1990	221	25.1256	60.3015	G3-D-TFC-SUL	0.06	1989	221	30.1659	45.2489
Control (37.7554103, 14.9884877)	2019-07-12	11:35:00	2019-07-12	15:11:00	26.8	781	34.9	793	PM0.5-0.25	G3-D-TFD-MET	0	1990	221	0	35.1759	G3-D-TFD-SUL	-0.07	1989	221	0	15.083
Control (37.7554103, 14.9884877)	2019-07-12	11:35:00	2019-07-12	15:11:00	26.8	781	34.9	793	PM0.25	G3-D-TFE-MET	0.07	1990	221	35.1759	35.1759	G3-D-TFE-SUL	0.03	1989	221	15.083	15.083

## Sheet: Ions
*All data are field-blank subtracted										ions (ug/m3) -->	Sodium	Ammonium	Potassium	Magnesium	Calcium	Acetate	Formate	Methansulphonate	Cloride	Nitrite	Nitrate	Succinate	Malonate	Sulphate	Oxalate	Phosphate		ions (ug/m3) -->	Sodium	Ammonium	Potassium	Magnesium	Calcium	Acetate	Formate	Methansulphonate	Cloride	Nitrite	Succinate	Nitrate	Malonate	Sulphate	Oxalate	Phosphate
Site	Start Date	Start Time	End Date	End Time	T start (°C)	P start (mbar)	T end (°C)	P end (mbar)	Filter code	Size fraction	Na+	NH4 +	K+	Mg 2+	Ca 2+	Ac-	For-	MSA-	Cl-	NO2 -	NO3 -	Su 2-	Ma 2-	SO4 2-	Ox 2-	PO4 3-		Cumulative	Na+	NH4 +	K+	Mg 2+	Ca 2+	Ac-	For-	MSA-	Cl-	NO2 -	Su 2-	NO3 -	Ma 2-	SO4 2-	Ox 2-	PO4 3-
Summit (37.7492631, 14.9921942)	2019-07-08	13:45:00	2019-07-08	15:45:00			18	640	G1-C-TFA-SUL	PM10-2.5	2.02955	2.19972	1.2565	0.387108	1.91047	0.00134143	0.0644104	0	0	0	0.08726	0	0	16.6781	0.044192	0		PM10	41.7099	16.4933	41.731	1.39778	11.2291	0.00972537	0.315057	0	20.6164	0	0.549704	0.00108984	0.000696594	283.313	2.21343	1.82786
Summit (37.7492631, 14.9921942)	2019-07-08	13:45:00	2019-07-08	15:45:00			18	640	G1-C-TFB-SUL	PM2.5-1	1.11925	2.47677	0.631925	0.193978	0.692778	0.00670715	0.151262	0	0.203951	0	0.312371	0.000544921	0.000696594	14.3742	0.124913	0		PM2.5	39.6803	14.2936	40.4745	1.01068	9.31866	0.00838394	0.250647	0	20.6164	0	0.462444	0.00108984	0.000696594	266.635	2.16924	1.82786
Summit (37.7492631, 14.9921942)	2019-07-08	13:45:00	2019-07-08	15:45:00			18	640	G1-C-TFC-SUL	PM1-0.5	2.0872	2.72428	2.80382	0.206691	0.755558	0	0	0	0.938986	0	0	0.000544921	0	23.5099	0.368607	1.30285		PM1	38.5611	11.8169	39.8426	0.816699	8.62588	0.00167679	0.0993843	0	20.4124	0	0.150074	0.000544921	0	252.261	2.04433	1.82786
Summit (37.7492631, 14.9921942)	2019-07-08	13:45:00	2019-07-08	15:45:00			18	640	G1-C-TFD-SUL	PM0.5-0.25	18.365	3.05504	10.0933	0	0	0.00167679	0.0370141	0	18.336	0	0.150074	0	0	103.458	0.386233	0		PM0.5	36.4739	9.09257	37.0387	0.610008	7.87032	0.00167679	0.0993843	0	19.4734	0	0.150074	0	0	228.751	1.67572	0.525012
Summit (37.7492631, 14.9921942)	2019-07-08	13:45:00	2019-07-08	15:45:00			18	640	G1-C-TFE-SUL	PM0.25	18.1089	6.03753	26.9454	0.610008	7.87032	0	0.0623702	0	1.1374	0	0	0	0	125.293	1.28949	0.525012		PM0.25	18.1089	6.03753	26.9454	0.610008	7.87032	0	0.0623702	0	1.1374	0	0	0	0	125.293	1.28949	0.525012
Summit (37.7491115, 14.9955540)	2019-07-12	12:45:00	2019-07-12	14:45:00	18	677	16.6	674	G2-C-TFA-SUL	PM10-2.5	8.77803	2.71748	0.56232	0.352963	2.1668	0	0	0.272491	0	0	0.201411	0	0	27.0393	0	0		PM10	19.0327	13.6004	15.0266	0.501175	3.22655	0.0235298	0.106893	0.272491	1.35422	0	1.80151	0.000579295	0.000740535	199.121	2.67132	0.756818
Summit (37.7491115, 14.9955540)	2019-07-12	12:45:00	2019-07-12	14:45:00	18	677	16.6	674	G2-C-TFB-SUL	PM2.5-1	0.955048	1.79752	1.25952	0.098771	0.752849	0.0235298	0.106893	0	0.744154	0	1.6001	0.000579295	0.000740535	7.37789	1.96201	0.0880919		PM2.5	10.2547	10.883	14.4643	0.148213	1.05974	0.0235298	0.106893	0	1.35422	0	1.6001	0.000579295	0.000740535	172.082	2.67132	0.756818
Summit (37.7491115, 14.9955540)	2019-07-12	12:45:00	2019-07-12	14:45:00	18	677	16.6	674	G2-C-TFC-SUL	PM1-0.5	0.106304	1.74042	0.452202	0	0	0	0	0	0	0	0	0	0	12.4524	0.24576	0.394806		PM1	9.29961	9.08543	13.2048	0.0494418	0.306896	0	0	0	0.610065	0	0	0	0	164.704	0.709311	0.668727
Summit (37.7491115, 14.9955540)	2019-07-12	12:45:00	2019-07-12	14:45:00	18	677	16.6	674	G2-C-TFD-SUL	PM0.5-0.25	2.51094	2.13111	3.32766	0	0	0	0	0	0	0	0	0	0	63.9369	0.132521	0		PM0.5	9.19331	7.34502	12.7525	0.0494418	0.306896	0	0	0	0.610065	0	0	0	0	152.252	0.46355	0.273921
Summit (37.7491115, 14.9955540)	2019-07-12	12:45:00	2019-07-12	14:45:00	18	677	16.6	674	G2-C-TFE-SUL	PM0.25	6.68237	5.21391	9.42489	0.0494418	0.306896	0	0	0	0.610065	0	0	0	0	88.3149	0.33103	0.273921		PM0.25	6.68237	5.21391	9.42489	0.0494418	0.306896	0	0	0	0.610065	0	0	0	0	88.3149	0.33103	0.273921
Milo (37.731172, 15.113134)	2019-07-10	12:00:00	2019-07-11	12:20:00	29	914	31.5	908.333	G2-D-TFA-SUL	PM10-2.5	0.6624	0.0227103	0.0178593	0.0911578	0.639627	0.00590093	0.00469674	0	0.815383	0.0154364	1.08462	0	0	0.604027	0.0437463	0		PM10	1.17395	0.716303	0.270692	0.155599	1.24119	0.0143433	0.00799714	0.0278748	1.09703	0.0641484	1.90515	0	0	2.98114	0.20616	0.120655
Milo (37.731172, 15.113134)	2019-07-10	12:00:00	2019-07-11	12:20:00	29	914	31.5	908.333	G2-D-TFB-SUL	PM2.5-1	0.260485	0.0114372	0.00515223	0.0367104	0.256983	0.00192803	0.00147249	0	0.202332	0	0.566799	0	0	0.264706	0.0291049	0		PM2.5	0.51155	0.693593	0.252833	0.0644417	0.601567	0.00844241	0.00330041	0.0278748	0.281652	0.048712	0.820534	0	0	2.37711	0.162413	0.120655
Milo (37.731172, 15.113134)	2019-07-10	12:00:00	2019-07-11	12:20:00	29	914	31.5	908.333	G2-D-TFC-SUL	PM1-0.5	0.0731132	0.0195089	0	0	0.120694	0.00113929	0	0	0	0.0116056	0.135311	0	0	0.158188	0.0396743	0.0165967		PM1	0.251065	0.682156	0.247681	0.0277312	0.344585	0.00651439	0.00182792	0.0278748	0.07932	0.048712	0.253735	0	0	2.11241	0.133308	0.120655
Milo (37.731172, 15.113134)	2019-07-10	12:00:00	2019-07-11	12:20:00	29	914	31.5	908.333	G2-D-TFD-SUL	PM0.5-0.25	0.0269629	0.260621	0.0198347	0	0	0	0	0.0122593	0	0.00537215	0	0	0	0.687386	0.0244988	0		PM0.5	0.177952	0.662647	0.247681	0.0277312	0.223891	0.0053751	0.00182792	0.0278748	0.07932	0.0371063	0.118423	0	0	1.95422	0.0936341	0.104058
Milo (37.731172, 15.113134)	2019-07-10	12:00:00	2019-07-11	12:20:00	29	914	31.5	908.333	G2-D-TFE-SUL	PM0.25	0.150989	0.402026	0.227846	0.0277312	0.223891	0.0053751	0.00182792	0.0156155	0.07932	0.0317342	0.118423	0	0	1.26683	0.0691352	0.104058		PM0.25	0.150989	0.402026	0.227846	0.0277312	0.223891	0.0053751	0.00182792	0.0156155	0.07932	0.0317342	0.118423	0	0	1.26683	0.0691352	0.104058
Control (37.7554103, 14.9884877)	2019-07-12	11:35:00	2019-07-12	15:11:00	26.8	781	34.9	793	G3-D-TFA-SUL	PM10-2.5	0	0	0	0	0	0	0	0	0	0.00389818	0	0.502975	0	0	0	0		PM10	0.106868	1.62829	0	0.000732479	0	0.0059899	0	0	0	1.33318	0	0.502975	5.13374	4.15982	0	0
Control (37.7554103, 14.9884877)	2019-07-12	11:35:00	2019-07-12	15:11:00	26.8	781	34.9	793	G3-D-TFB-SUL	PM2.5-1	0	0	0	0	0	0.00347801	0	0	0	0.190861	0	0	0	0	0	0		PM2.5	0.106868	1.62829	0	0.000732479	0	0.0059899	0	0	0	1.32928	0	0	5.13374	4.15982	0	0
Control (37.7554103, 14.9884877)	2019-07-12	11:35:00	2019-07-12	15:11:00	26.8	781	34.9	793	G3-D-TFC-SUL	PM1-0.5	0.0815543	0.422591	0	0	0	0	0	0	0	0.546195	0	0	0	3.10796	0	0		PM1	0.106868	1.62829	0	0.000732479	0	0.00251189	0	0	0	1.13842	0	0	5.13374	4.15982	0	0
Control (37.7554103, 14.9884877)	2019-07-12	11:35:00	2019-07-12	15:11:00	26.8	781	34.9	793	G3-D-TFD-SUL	PM0.5-0.25	0	0.465845	0	0	0	0	0	0	0	0.182315	0	0	0	1.05186	0	0		PM0.5	0.0253139	1.2057	0	0.000732479	0	0.00251189	0	0	0	0.592223	0	0	5.13374	1.05186	0	0
Control (37.7554103, 14.9884877)	2019-07-12	11:35:00	2019-07-12	15:11:00	26.8	781	34.9	793	G3-D-TFE-SUL	PM0.25	0.0253139	0.73985	0	0.000732479	0	0.00251189	0	0	0	0.409909	0	0	5.13374	0	0	0		PM0.25	0.0253139	0.73985	0	0.000732479	0	0.00251189	0	0	0	0.409909	0	0	5.13374	0	0	0

## Sheet: Metals
*All data are field-blank subtracted										elements (ng/m3) -->		Soluble in ultrapure water																					elements (ng/m3) -->			Soluble in ultrapure water
Site	Start Date	Start Time	End Date	End Time	T start (°C)	P start (mbar)	T end (°C)	P end (mbar)	Filter code	Size fraction	Pb	Tl	Ba	Sr	Rb	Br	La	Cd	Se	As	Ga	Zn	Cu	Ni	Fe	Mn	Cr	V	P	Al	B		Cumulative	Pb	Tl	Ba	Sr	Rb	Br	La	Cd	Se	As	Ga	Zn	Cu	Ni	Fe	Mn
Summit (37.7492631, 14.9921942)	2019-07-08	13:45:00	2019-07-08	15:45:00			18	640	G1-C-TFA-MET	PM10-2.5	0	0.0323792	0.0468716	0.483267	0.0567549	4.77812	0.0270757	0.00688843	0	0.527444	0	0	0	0	8.51961	0.574675	0	0.0315532	0	28.1813	0		PM10	84.2373	31.1692	2.79819	6.20196	59.6613	36.79	0.549024	10.1624	62.5974	39.0323	0.531582	40.5737	483.871	1.91902	404.67	13.1441
Summit (37.7492631, 14.9921942)	2019-07-08	13:45:00	2019-07-08	15:45:00			18	640	G1-C-TFB-MET	PM2.5-1	0	0.795523	2.20964	5.07738	0.784736	0	0.478135	0.219721	0.766496	0.66682	0.359788	0	6.75329	0	156.172	7.27856	0.127465	0.67094	15.7265	329.895	0		PM2.5	84.2373	31.1368	2.75132	5.7187	59.6046	32.0119	0.521948	10.1555	62.5974	38.5049	0.531582	40.5737	483.871	1.91902	396.15	12.5694
Summit (37.7492631, 14.9921942)	2019-07-08	13:45:00	2019-07-08	15:45:00			18	640	G1-C-TFC-MET	PM1-0.5	0	0.0353476	0.210185	0.0515559	0.00193929	0	0	0.00364564	0	4.87242	0.0263065	0	0	0.162339	2.01833	0.0314178	0	0	2.08446	5.03122	0		PM1	84.2373	30.3413	0.541676	0.641311	58.8198	32.0119	0.0438127	9.93582	61.8309	37.838	0.171794	40.5737	477.118	1.91902	239.978	5.29084
Summit (37.7492631, 14.9921942)	2019-07-08	13:45:00	2019-07-08	15:45:00			18	640	G1-C-TFD-MET	PM0.5-0.25	30.3374	13.7083	0	0.589755	26.185	13.2933	0.03593	4.05627	42.1096	24.9432	0.0440231	18.924	186.753	0.126593	111.503	2.58204	0.100984	0.633747	0	37.6988	0		PM0.5	84.2373	30.306	0.33149	0.589755	58.8179	32.0119	0.0438127	9.93218	61.8309	32.9656	0.145487	40.5737	477.118	1.75669	237.96	5.25943
Summit (37.7492631, 14.9921942)	2019-07-08	13:45:00	2019-07-08	15:45:00			18	640	G1-C-TFE-MET	PM0.25	53.8999	16.5977	0.33149	0	32.6329	18.7186	0.00788269	5.87591	19.7214	8.02238	0.101464	21.6497	290.365	1.63009	126.457	2.67739	0.211946	0.638142	36.5078	229.824	0		PM0.25	53.8999	16.5977	0.33149	0	32.6329	18.7186	0.00788269	5.87591	19.7214	8.02238	0.101464	21.6497	290.365	1.63009	126.457	2.67739
Summit (37.7491115, 14.9955540)	2019-07-12	12:45:00	2019-07-12	14:45:00	18	677	16.6	674	G2-C-TFA-MET	PM10-2.5	0	0.544191	6.61065	27.7476	1.43091	10.9711	2.03149	0.330511	1.45593	0.570963	1.14552	16.049	6.63763	17.0795	49.2548	33.6605	0.0227868	0.93714	43.2728	891.272	0		PM10	69.2832	24.9439	12.179	39.7735	41.735	70.367	3.26012	11.4936	72.9819	41.6972	2.41509	87.4722	239.971	22.7726	336.819	53.9944
Summit (37.7491115, 14.9955540)	2019-07-12	12:45:00	2019-07-12	14:45:00	18	677	16.6	674	G2-C-TFB-MET	PM2.5-1	0	0.945451	3.44078	8.35314	1.22974	3.65352	0.862115	0.527684	2.82431	0.709535	0.648191	0	5.05926	0.21617	15.7532	10.635	0.120533	0.455022	32.325	203.994	0		PM2.5	69.2832	24.3997	5.56838	12.0259	40.304	59.3959	1.22863	11.1631	71.5259	41.1263	1.26957	71.4232	233.333	5.69314	287.564	20.3339
Summit (37.7491115, 14.9955540)	2019-07-12	12:45:00	2019-07-12	14:45:00	18	677	16.6	674	G2-C-TFC-MET	PM1-0.5	6.47675	1.91572	1.53957	2.88414	2.1501	7.47991	0.256096	0.889498	5.0695	5.20873	0.315724	11.0225	12.24	2.49584	42.2279	3.3716	0.120407	0.257802	51.0639	133.036	0		PM1	69.2832	23.4543	2.12759	3.67273	39.0743	55.7424	0.366511	10.6354	68.7016	40.4167	0.621377	71.4232	228.274	5.47697	271.811	9.69889
Summit (37.7491115, 14.9955540)	2019-07-12	12:45:00	2019-07-12	14:45:00	18	677	16.6	674	G2-C-TFD-MET	PM0.5-0.25	40.4611	13.4848	0	0.635762	24.0277	18.7566	0.0812724	6.23595	45.3336	26.6406	0.12953	27.3271	121.581	1.19492	142.452	2.99737	0.0790595	0.620543	0	98.8808	0		PM0.5	62.8064	21.5385	0.58802	0.78859	36.9242	48.2625	0.110415	9.74594	63.6321	35.208	0.305654	60.4007	216.034	2.98113	229.583	6.32729
Summit (37.7491115, 14.9955540)	2019-07-12	12:45:00	2019-07-12	14:45:00	18	677	16.6	674	G2-C-TFE-MET	PM0.25	22.3453	8.05376	0.58802	0.152828	12.8965	29.5058	0.0291429	3.50998	18.2986	8.56735	0.176124	33.0736	94.4529	1.78621	87.1308	3.32992	0.675934	0.235281	61.1925	222.059	0		PM0.25	22.3453	8.05376	0.58802	0.152828	12.8965	29.5058	0.0291429	3.50998	18.2986	8.56735	0.176124	33.0736	94.4529	1.78621	87.1308	3.32992
Milo (37.731172, 15.113134)	2019-07-10	12:00:00	2019-07-11	12:20:00	29	914	31.5	908.333	G2-D-TFA-MET	PM10-2.5	0	0.0111593	2.4142	4.33721	0.285759	3.36354	0.329202	0.00563595	0.0231365	0	0.382177	0.879437	1.23056	0.144052	103.277	5.68612	0.0613098	0.524152	26.7802	178.216	0		PM10	0.0660054	0.0698797	2.89036	4.79142	0.415548	7.82412	0.365226	0.0428172	0.0885176	2.56449	0.458003	3.63215	1.47858	0.828106	106.649	6.36619
Milo (37.731172, 15.113134)	2019-07-10	12:00:00	2019-07-11	12:20:00	29	914	31.5	908.333	G2-D-TFB-MET	PM2.5-1	0	5.90683e-05	0.00161325	0.0195719	0.00416335	0	0.0186791	0	0	0.0475599	5.80219e-05	0	0	0	0.562071	0.030504	0.00110476	0	0.0434022	0	0		PM2.5	0.0660054	0.0587204	0.476156	0.454208	0.129788	4.46059	0.0360243	0.0371813	0.0653812	2.56449	0.0758258	2.75272	0.248016	0.684054	3.37197	0.680071
Milo (37.731172, 15.113134)	2019-07-10	12:00:00	2019-07-11	12:20:00	29	914	31.5	908.333	G2-D-TFC-MET	PM1-0.5	0.0386267	0.000400889	0.0495477	0.0977788	0.00425711	0.0159505	0.00136071	3.58187e-05	0	0.00356074	0.00939469	0.731911	0	0.0499412	0.735077	0.130904	0.00213024	0	3.06105	1.17493	0		PM1	0.0660054	0.0586614	0.474543	0.434636	0.125625	4.46059	0.0173452	0.0371813	0.0653812	2.51693	0.0757678	2.75272	0.248016	0.684054	2.8099	0.649567
Milo (37.731172, 15.113134)	2019-07-10	12:00:00	2019-07-11	12:20:00	29	914	31.5	908.333	G2-D-TFD-MET	PM0.5-0.25	0	0	0	0	0	0	0.000179392	0.000551291	0.0486721	1.50159	0	0	0	0.0336054	0	0	0.00313771	0	0	0	0		PM0.5	0.0273787	0.0582605	0.424995	0.336857	0.121368	4.44463	0.0159845	0.0371454	0.0653812	2.51337	0.0663731	2.0208	0.248016	0.634113	2.07482	0.518663
Milo (37.731172, 15.113134)	2019-07-10	12:00:00	2019-07-11	12:20:00	29	914	31.5	908.333	G2-D-TFE-MET	PM0.25	0.0273787	0.0582605	0.424995	0.336857	0.121368	4.44463	0.0158051	0.0365941	0.0167091	1.01178	0.0663731	2.0208	0.248016	0.600507	2.07482	0.518663	0.0528407	1.13849	3.47403	6.37151	1.2939		PM0.25	0.0273787	0.0582605	0.424995	0.336857	0.121368	4.44463	0.0158051	0.0365941	0.0167091	1.01178	0.0663731	2.0208	0.248016	0.600507	2.07482	0.518663
Control (37.7554103, 14.9884877)	2019-07-12	11:35:00	2019-07-12	15:11:00	26.8	781	34.9	793	G3-D-TFA-MET	PM10-2.5	0	0.00427013	0.0722678	0.943673	0.0772435	3.95723	0.069394	0.0109644	0	0.539903	0	2.86939	0.529356	0	21.3493	0.889715	0.00176147	0.0844327	0	38.6509	0		PM10	0	0.0467908	0.671955	1.12984	0.112473	4.77623	0.161222	0.0618522	0.474465	0.987968	0.0926899	5.88426	2.63608	1.72861	33.9511	2.47035
Control (37.7554103, 14.9884877)	2019-07-12	11:35:00	2019-07-12	15:11:00	26.8	781	34.9	793	G3-D-TFB-MET	PM2.5-1	0	0.00414624	0	0	0	0	0.0696422	0	0	0	0.0150914	0	0	0	0.476805	0	0.0203032	0	2.34628	0	0		PM2.5	0	0.0425207	0.599688	0.186169	0.0352298	0.819002	0.0918276	0.0508878	0.474465	0.448065	0.0926899	3.01488	2.10672	1.72861	12.6018	1.58064
Control (37.7554103, 14.9884877)	2019-07-12	11:35:00	2019-07-12	15:11:00	26.8	781	34.9	793	G3-D-TFC-MET	PM1-0.5	0	0.0165196	0.233944	0.078333	0.0202224	0.100097	0.00366344	0.00470518	0	0.079233	0.038352	3.01488	0.642653	0.115548	1.91589	0.144997	2.29327e-05	0	13.445	5.10424	0		PM1	0	0.0383745	0.599688	0.186169	0.0352298	0.819002	0.0221854	0.0508878	0.474465	0.448065	0.0775985	3.01488	2.10672	1.72861	12.125	1.58064
Control (37.7554103, 14.9884877)	2019-07-12	11:35:00	2019-07-12	15:11:00	26.8	781	34.9	793	G3-D-TFD-MET	PM0.5-0.25	0	0.0177986	0	0.00763937	0	0.213064	0.00745156	0.0461826	0.437932	0	0	0	0.656442	0	0.184751	0.0329813	0.0135248	0.00108007	4.1861	0.611852	0		PM0.5	0	0.0218549	0.365744	0.107836	0.0150074	0.718906	0.0185219	0.0461826	0.474465	0.368832	0.0392464	0	1.46407	1.61306	10.2091	1.43564
Control (37.7554103, 14.9884877)	2019-07-12	11:35:00	2019-07-12	15:11:00	26.8	781	34.9	793	G3-D-TFE-MET	PM0.25	0	0.00405625	0.365744	0.100197	0.0150074	0.505841	0.0110704	0	0.0365329	0.368832	0.0392464	0	0.807626	1.61306	10.0244	1.40266	0.120825	0.0858278	14.029	15.6468	0		PM0.25	0	0.00405625	0.365744	0.100197	0.0150074	0.505841	0.0110704	0	0.0365329	0.368832	0.0392464	0	0.807626	1.61306	10.0244	1.40266
[truncated: 49 more columns]
