# Supplementary material for: Metal speciation of volcanic aerosols from Mt. Etna at varying aerosol water content and pH obtained by different thermodynamic models
Source: Royal Society of Chemistry journal article supplement (doi:10.1039/d4ea00108g), 2024-10-31
Supplement: d4ea00108g2.pdf [file d4ea00108g2.pdf]

Supplementary Information for

Metal speciation of volcanic aerosol from Mt. Etna under varying aerosol water content and pH obtained by different thermodynamic models

Tegan Hull<sup>1</sup>, Sara D'Aronco<sup>1,2</sup>, Suzanne Crumeyrolle<sup>3</sup>, Benjamin Hanoune<sup>4</sup>, Salvatore Giammanco<sup>5</sup>, Alessandro La Spina<sup>5</sup>, Giuseppe Salerno<sup>5</sup>, Lidia Soldà<sup>2</sup>, Denis Badocco<sup>2</sup>, Paolo Pastore<sup>2</sup>, Pasquale Sellitto<sup>5,6</sup>, Chiara Giorio<sup>1,2\*</sup>

<sup>1</sup> Yusuf Hamied Department of Chemistry, University of Cambridge, Lensfield Road, Cambridge, CB2 1EW, United Kingdom

<sup>2</sup> Dipartimento di Scienze Chimiche, Università degli Studi di Padova, Via Marzolo 1, 35131 Padova, Italy

<sup>3</sup> CNRS, UMR 8518 - LOA - Laboratoire d'Optique Atmosphérique, Université Lille, Lille, France

<sup>4</sup> Université Lille, CNRS, UMR 8522 - PC2A - Physicochimie des Processus de Combustion et de l'Atmosphère, Lille, France

<sup>5</sup> Istituto Nazionale di Geofisica e Vulcanologia, Osservatorio Etneo, Catania, Italy

<sup>6</sup> Univ Paris-Est Créteil and Université de Paris Cité, CNRS, Laboratoire Interuniversitaire des Systèmes Atmosphériques, Institut Pierre Simon Laplace, Créteil, France

\*Corresponding author: [chiara.giorio@atm.ch.cam.ac.uk](mailto:chiara.giorio@atm.ch.cam.ac.uk)

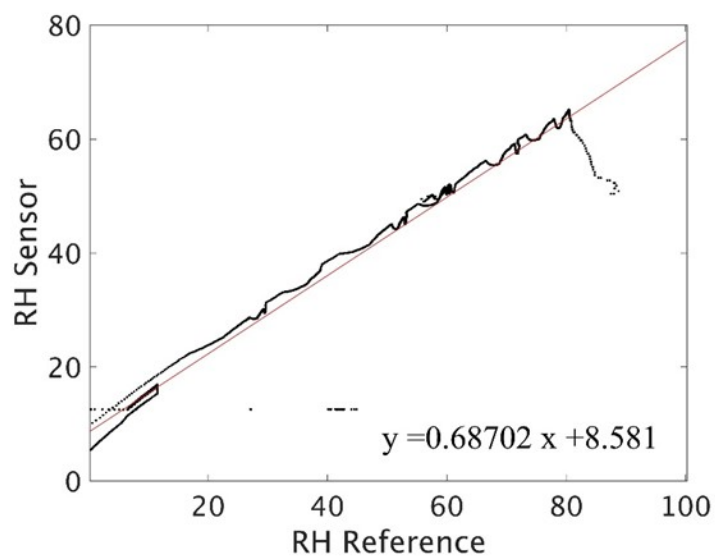

Figure S1. Comparison of the low-cost RH sensor and the reference RH instrument.

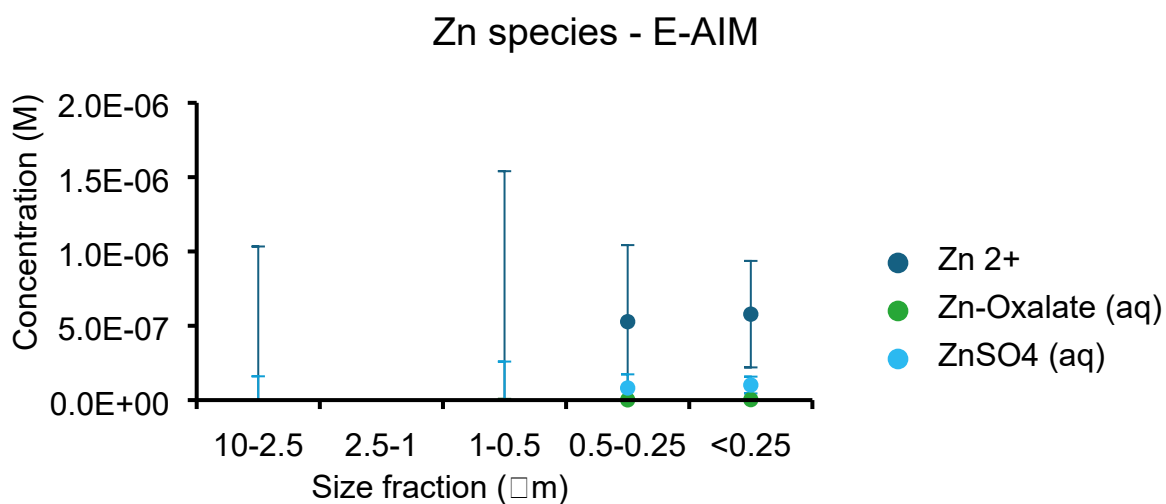

Figure S2. Detailed speciation of Zn<sup>2+</sup> using pH and water content calculated using E-AIM for samples collected at the summit of Mt Etna.

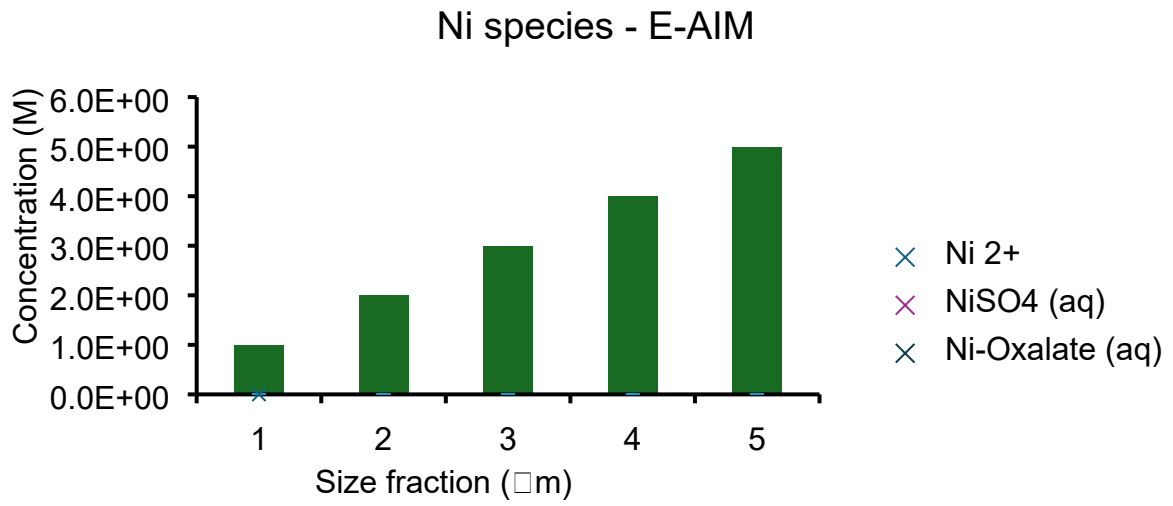

**Figure S3. Detailed speciation of Ni<sup>2+</sup> using pH and water content calculated using E-AIM for samples collected at the summit of Mt Etna.**
